# Supplementary material for: Quercetin Alleviates Inflammation and Energy Deficiency Induced by Lipopolysaccharide in Chicken Embryos
Source: MDPI journal article supplement (doi:10.3390/ani13132051), 2023-06-21
Supplement: s1 [file s1]

## The legends of supplementary Figure

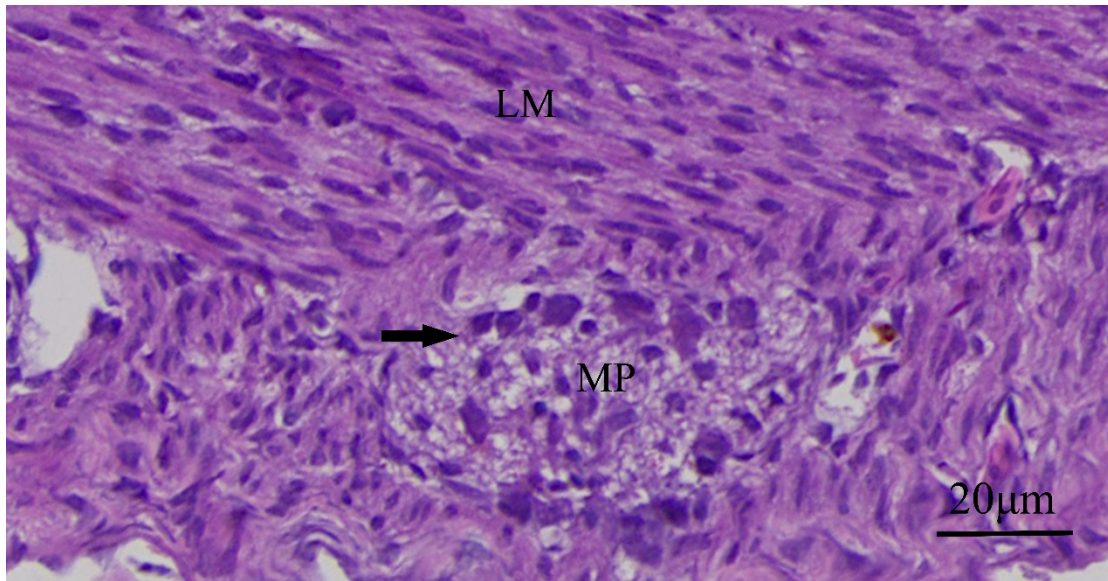

Supplementary Figure S1: The Histopathologic changes of the duodena induced by LPS and treated quercetin in chicken embryos (800×)

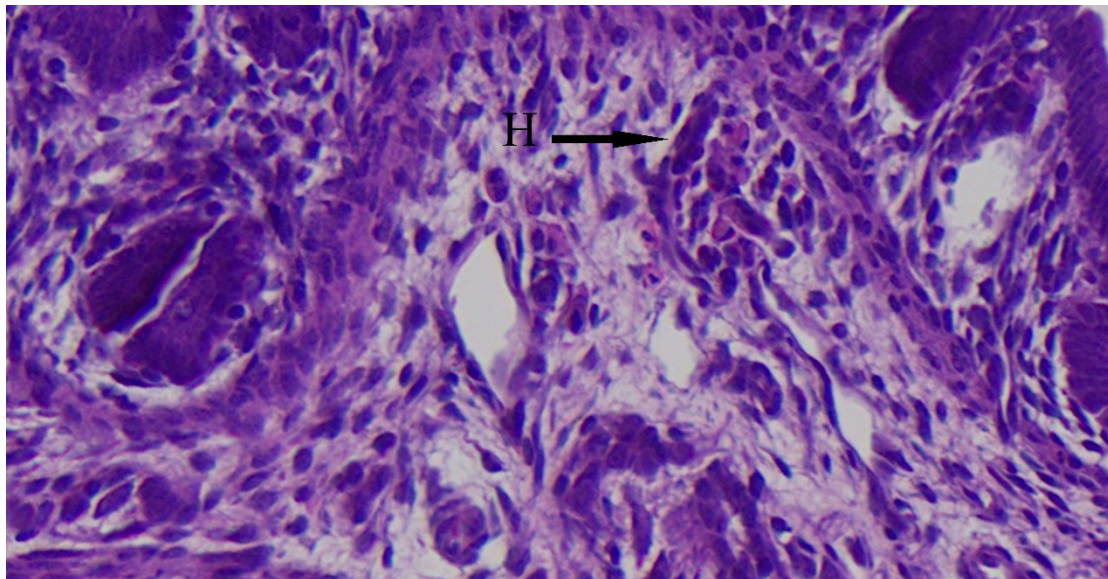

Supplementary Figure S2: The Histopathologic changes of the ceca induced by LPS and treated quercetin in chicken embryos (800×)

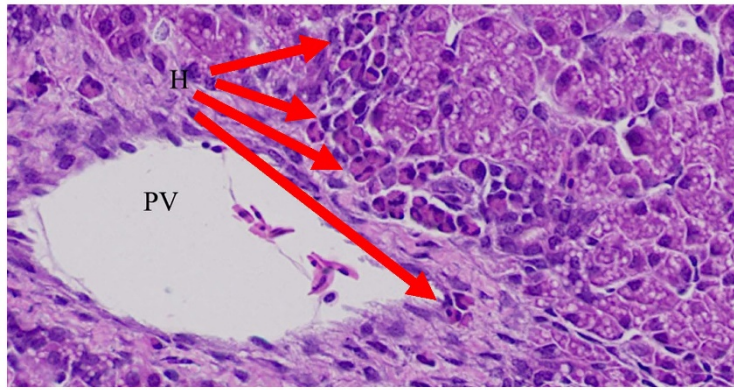

Supplementary Figure S3: The Histopathologic changes of the livers induced by LPS and treated quercetin in chicken embryos (800×)
